# Supplementary material
Source: PubMed Central journal article supplement (PMC8432267)

## **ONLINE RESOURCES**

### ***Cancer Causes and Control***

#### **Risk of abnormal cervical cytology in HIV-infected women testing positive for both human papillomavirus and Epstein-Barr virus in genital tract specimens**

Jennifer E. Cameron<sup>#1,4</sup>, D'Antoni C. Dennis<sup>1,a</sup>, Nicholas R. Herrel<sup>1,b</sup>, Andrew G. Chapple<sup>3</sup> and Michael E. Hagensee<sup>2,4</sup>

Departments of <sup>1</sup>Microbiology, Immunology & Parasitology and <sup>2</sup>Medicine, School of Medicine; <sup>3</sup>Biostatistics Program, School of Public Health; and <sup>4</sup>The Stanley S. Scott Cancer Center, Louisiana State University Health Sciences Center, New Orleans, Louisiana, USA.

#### **#CORRESPONDING AUTHOR**

Jennifer E. Cameron, Ph.D. Louisiana State University Health Sciences Center, Department of Microbiology, Immunology & Parasitology, 1901 Perdido St., New Orleans, LA 70112, USA.

Phone: 504-568-2196. Fax: 504-568-2918. Email address: [jcame2@lsuhsc.edu](mailto:jcame2@lsuhsc.edu)

ORCID: <https://orcid.org/0000-0002-5785-2410>

**Online resource 1.** HPV genotype prevalence and association with EBV detection.

| HPV genotype  | Overall cohort<br><i>n</i> = 115 | EBV negative<br><i>n</i> = 100 | EBV positive<br><i>n</i> = 15 | <i>p</i> -value |
|---------------|----------------------------------|--------------------------------|-------------------------------|-----------------|
| Low-Risk      | No. (%)                          | No. (%)                        | No. (%)                       |                 |
| HPV-6         | 10 (8.7)                         | 6 (6.0)                        | 4 (26.7)                      | <b>0.008</b>    |
| HPV-11        | 1 (0.9)                          | 1 (1.0)                        | 0 (0)                         | 0.697           |
| HPV-40        | 3 (2.6)                          | 2 (2.0)                        | 1 (6.7)                       | 0.290           |
| HPV-42        | 6 (5.2)                          | 4 (4.0)                        | 2 (13.3)                      | 0.130           |
| HPV-53        | 11 (9.6)                         | 8 (8.0)                        | 3 (20.0)                      | 0.141           |
| HPV-54        | 16 (13.9)                        | 15 (15.0)                      | 1 (6.7)                       | 0.385           |
| HPV-66        | 14 (12.2)                        | 12 (12.0)                      | 2 (13.3)                      | 0.883           |
| HPV-84 (MM8)  | 14 (12.2)                        | 12 (12.0)                      | 2 (13.3)                      | 0.883           |
| High-Risk     |                                  |                                |                               |                 |
| HPV-16        | 4 (3.5)                          | 3 (3.0)                        | 1 (6.7)                       | 0.470           |
| HPV-18        | 10 (8.7)                         | 7 (7.0)                        | 3 (20.0)                      | 0.096           |
| HPV-26*       | 4 (3.5)                          | 3 (3.0)                        | 1 (6.7)                       | 0.470           |
| HPV-31        | 5 (4.3)                          | 4 (4.0)                        | 1 (6.7)                       | 0.637           |
| HPV-33        | 2 (1.7)                          | 2 (2.0)                        | 0 (0)                         | 0.581           |
| HPV-35        | 8 (7.0)                          | 5 (5.0)                        | 3 (20.0)                      | <b>0.033</b>    |
| HPV-39        | 5 (4.3)                          | 5 (5.0)                        | 0 (0)                         | 0.376           |
| HPV-45        | 9 (7.8)                          | 9 (9.0)                        | 0 (0)                         | 0.226           |
| HPV-51        | 10 (8.7)                         | 10 (10.0)                      | 0 (0)                         | 0.200           |
| HPV-52        | 20 (17.4)                        | 18 (18.0)                      | 2 (13.3)                      | 0.657           |
| HPV-55*       | 14 (12.2)                        | 13 (13.0)                      | 1 (6.7)                       | 0.484           |
| HPV-56        | 4 (3.5)                          | 3 (3.0)                        | 1 (6.7)                       | 0.470           |
| HPV-58        | 14 (12.2)                        | 13 (13.0)                      | 1 (6.7)                       | 0.484           |
| HPV-59        | 17 (14.8)                        | 15 (15.0)                      | 2 (13.3)                      | 0.865           |
| HPV-68        | 8 (7.0)                          | 7 (7.0)                        | 1 (6.7)                       | 0.962           |
| HPV-82 (MM4)* | 2 (1.7)                          | 2 (2.0)                        | 0 (0)                         | 0.581           |
| HPV-83 (MM7)* | 26 (22.6)                        | 24 (24.0)                      | 2 (13.3)                      | 0.357           |
| HPV-73 (MM9)* | 9 (7.8)                          | 6 (6.0)                        | 3 (20.0)                      | 0.060           |

Abbreviations: HPV, human papillomavirus. EBV, Epstein-Barr virus.

Probability (*p*) was calculated using Chi-square analysis or Fisher Exact test.

\*These intermediate-risk HPV types have been re-classified as low-risk viruses but were treated as high-risk viruses for the primary analysis presented in this report.

**Online resource 2.** Risk factors<sup>a</sup> for EBV detection in cervicovaginal lavage of HIV-positive women who are also hrHPV-positive.

|                               | hrHPV = IARC-12 + HPV-68<br><i>n</i> = 85           |                                                     |                                  | hrHPV = IARC-12 + HPV-26, 55, 68,<br>73, 82, 83<br><i>n</i> = 102 |                                                     |                                  |
|-------------------------------|-----------------------------------------------------|-----------------------------------------------------|----------------------------------|-------------------------------------------------------------------|-----------------------------------------------------|----------------------------------|
|                               | EBV<br>Negative<br>( <i>n</i> = 72)<br><i>n</i> (%) | EBV<br>Positive<br>( <i>n</i> = 13)<br><i>n</i> (%) | <i>p</i> -<br>value <sup>b</sup> | EBV<br>Negative<br>( <i>n</i> = 88)<br><i>n</i> (%)               | EBV<br>Positive<br>( <i>n</i> = 14)<br><i>n</i> (%) | <i>p</i> -<br>value <sup>b</sup> |
| Race/Ethnicity                |                                                     |                                                     | 0.056 <sup>c</sup>               |                                                                   |                                                     | <b>0.039<sup>c</sup></b>         |
| Caucasian                     | 9 (90.0)                                            | 1 (10.0)                                            |                                  | 10 (11.4)                                                         | 1 (7.1)                                             |                                  |
| African-American              | 63 (85.1)                                           | 11 (14.9)                                           |                                  | 78 (88.6)                                                         | 12 (85.7)                                           |                                  |
| Hispanic                      | 0 (0)                                               | 1 (100.0)                                           |                                  | 0 (0)                                                             | 1 (7.1)                                             |                                  |
| Age                           |                                                     |                                                     | 0.264                            |                                                                   |                                                     | 0.298                            |
| 20-30                         | 27 (93.1)                                           | 2 (6.9)                                             |                                  | 31 (35.2)                                                         | 2 (14.3)                                            |                                  |
| 31-40                         | 28 (82.4)                                           | 6 (17.6)                                            |                                  | 33 (37.5)                                                         | 7 (50.0)                                            |                                  |
| >40                           | 17 (77.3)                                           | 5 (22.7)                                            |                                  | 24 (27.3)                                                         | 5 (35.7)                                            |                                  |
| Mean (SD)                     | 34.4 (8.1)                                          | 37.9 (7.4)                                          | 0.156                            | 34.8                                                              | 37.8                                                | 0.195                            |
| Marital status                |                                                     |                                                     | 1.000                            |                                                                   |                                                     | 1.000                            |
| Married/co-habitant partner   | 6 (84.6)                                            | 1 (15.4)                                            |                                  | 7 (8.0)                                                           | 1 (7.1)                                             |                                  |
| Single/divorced/widowed       | 66 (85.7)                                           | 12 (14.3)                                           |                                  | 81 (92.0)                                                         | 13 (92.9)                                           |                                  |
| Education level               |                                                     |                                                     | 0.315                            |                                                                   |                                                     | 0.313                            |
| 6-11 years                    | 7 (70.0)                                            | 3 (30.0)                                            |                                  | 8 (9.5)                                                           | 3 (21.4)                                            |                                  |
| High School graduate          | 58 (87.9)                                           | 8 (12.1)                                            |                                  | 68 (80.9)                                                         | 8 (57.1)                                            |                                  |
| College graduate or above     | 4 (80.0)                                            | 1 (20.0)                                            |                                  | 8 (9.5)                                                           | 3 (21.4)                                            |                                  |
| Smoking history               |                                                     |                                                     | 1.000                            |                                                                   |                                                     | 0.937                            |
| Never                         | 37 (88.1)                                           | 7 (15.9)                                            |                                  | 45 (51.1)                                                         | 7 (50.0)                                            |                                  |
| Ever                          | 35 (85.4)                                           | 6 (14.6)                                            |                                  | 43 (48.9)                                                         | 7 (50.0)                                            |                                  |
| Parity                        |                                                     |                                                     | 0.582                            |                                                                   |                                                     | 0.588                            |
| Nulliparous                   | 6 (100.0)                                           | 0 (0)                                               |                                  | 6 (7.3)                                                           | 0 (0)                                               |                                  |
| ≥ 1                           | 60 (82.2)                                           | 13 (17.8)                                           |                                  | 76 (92.7)                                                         | 14 (100)                                            |                                  |
| History of abnormal Pap smear |                                                     |                                                     | 0.742                            |                                                                   |                                                     | 0.535                            |
| Yes                           | 41 (80.4)                                           | 10 (19.6)                                           |                                  | 49 (65.3)                                                         | 11 (78.6)                                           |                                  |
| No                            | 19 (86.4)                                           | 3 (13.6)                                            |                                  | 26 (34.7)                                                         | 3 (21.4)                                            |                                  |
| Male sex partners, past year  |                                                     |                                                     | 0.398                            |                                                                   |                                                     | 0.644                            |
| None                          | 7 (77.8)                                            | 2 (22.2)                                            |                                  | 9 (13.0)                                                          | 2 (22.2)                                            |                                  |
| 1                             | 36 (92.3)                                           | 3 (7.7)                                             |                                  | 41 (59.4)                                                         | 4 (44.4)                                            |                                  |

|                               |              |             |       |              |             |       |
|-------------------------------|--------------|-------------|-------|--------------|-------------|-------|
| 2 or more                     | 16 (84.2)    | 3 (15.8)    |       | 19 (27.5)    | 3 (33.4)    |       |
| Male sex partners, past month |              |             | 0.688 |              |             | 0.713 |
| None                          | 14 (82.4)    | 3 (17.6)    |       | 16 (27.6)    | 3 (37.5)    |       |
| 1                             | 32 (88.9)    | 4 (11.1)    |       | 39 (67.2)    | 5 (62.5)    |       |
| 2 or more                     | 2 (100.0)    | 0 (0.0)     |       | 3 (5.2)      | 0 (0)       |       |
| CD4+ T cell count             |              |             | 0.972 |              |             | 0.981 |
| <200                          | 20 (83.3)    | 4 (16.7)    |       | 24 (27.9)    | 4 (28.6)    |       |
| 200-500                       | 27 (84.4)    | 5 (15.6)    |       | 33 (38.3)    | 5 (35.7)    |       |
| >500                          | 24 (85.7)    | 4 (14.3)    |       | 29 (33.7)    | 5 (35.7)    |       |
| Mean (SD)                     | 396 (268)    | 359 (216)   | 0.640 | 398 (273)    | 401 (258)   | 0.977 |
| Peripheral HIV viral load     |              |             | 0.682 |              |             | 0.557 |
| <400                          | 19 (90.5)    | 2 (9.5)     |       | 24 (27.9)    | 2 (14.3)    |       |
| 400-10,000                    | 23 (82.1)    | 5 (17.9)    |       | 25 (29.0)    | 5 (35.7)    |       |
| >10,000                       | 29 (82.9)    | 6 (17.1)    |       | 37 (43.0)    | 7 (50.0)    |       |
| Mean, x 10 <sup>3</sup> (SD)  | 84.6 (193.7) | 56.0 (97.5) | 0.605 | 95.4 (202.7) | 53.4 (94.2) | 0.450 |

<sup>a</sup>All data is self-reported on demographic survey, except CD4+ T cell counts and peripheral HIV viral load which were extracted from the clinical chart. Sum of individual data may not equal total column *n* due to missing data (participant did not respond, marked 'unknown', or information was otherwise unavailable).

<sup>b</sup>Probability (*p*) was derived from Chi square analysis, or Fisher Exact test when expected counts in one or more category was <5.

<sup>c</sup>Fisher Exact test *p*-value for Caucasians vs. African-Americans = 1.000.

Abbreviations: IARC, International Agency for Research on Cancer. HIV, human immunodeficiency virus. EBV, Epstein-Barr virus. hrHPV, high-risk human papillomavirus. SD, standard deviation.

**Online resource 3.** Multinomial regression model predicting abnormal cytology for women who had high-risk HPV infection.

**A) Model for SIL vs Normal Cytology**  
**hrHPV: IARC-12 + HPV-26, -55, -68, -73, -82, -83**

| Variable              | Coefficient | Test Statistic | <i>p</i> -value |
|-----------------------|-------------|----------------|-----------------|
| Intercept             | 2.089       | 1.844          | 0.065           |
| Age                   | -0.580      | -2.309         | <b>0.021</b>    |
| African American Race | -2.113      | -1.817         | 0.069           |
| CD4+ T Cell Count     | -0.671      | -2.532         | <b>0.011</b>    |
| EBV                   | 1.866       | 2.121          | <b>0.034</b>    |

**B) Model for SIL vs Normal Cytology**  
**hrHPV: IARC-12 + HPV-68**

| Variable              | Coefficient | Test Statistic | <i>p</i> -value |
|-----------------------|-------------|----------------|-----------------|
| Intercept             | 2.132       | 1.834          | 0.067           |
| Age                   | -0.572      | -2.026         | <b>0.043</b>    |
| African American Race | -1.822      | -1.529         | 0.126           |
| CD4+ T Cell Count     | -0.803      | -2.684         | <b>0.007</b>    |
| EBV                   | 1.373       | 1.530          | 0.127           |

Age and CD4 counts were standardized.

Abbreviations: IARC, International Agency for Research on Cancer. HPV, human papillomavirus. EBV, Epstein-Barr virus. SIL, squamous intraepithelial lesion (includes low-grade and high-grade SIL).

**Online resource 4.** Impact of genital high-risk HPV (IARC-12 +HPV-68) and human herpesvirus detection on cervical squamous intraepithelial lesions (SIL) in HIV-infected women.

| Genital hrHPV | Genital HHV | SIL-Negative No. (%) | SIL-Positive No. (%) | Odds Ratio (95% CI)           | p-value <sup>b</sup> |
|---------------|-------------|----------------------|----------------------|-------------------------------|----------------------|
| Any HHV       |             |                      |                      |                               |                      |
| -             | -           | 107 (84.9)           | 19 (15.1)            | Reference                     |                      |
| +             | -           | 31 (47.7)            | 34 (52.3)            | 6.18 (3.10-12.31)             | <b>&lt;0.0001</b>    |
| -             | +           | 18 (72.0)            | 7 (28.0)             | 2.19 (0.81-5.96)              | 0.12                 |
| +             | +           | 7 (35.0)             | 13 (65.0)            | 10.46 (3.69-29.61)            | <b>&lt;0.0001</b>    |
| +             | -           | 31 (47.7)            | 34 (52.3)            | Reference                     |                      |
| +             | +           | 7 (35.0)             | 13 (65.0)            | 1.69 (0.60-4.79) <sup>a</sup> | 0.32                 |
| EBV           |             |                      |                      |                               |                      |
| -             | -           | 112 (83.6)           | 22 (16.4)            | Reference                     |                      |
| +             | -           | 34 (47.2)            | 38 (52.8)            | 5.69 (2.97-10.90)             | <b>&lt;0.0001</b>    |
| -             | +           | 13 (76.5)            | 4 (23.5)             | 1.57 (0.47-5.26)              | 0.50                 |
| +             | +           | 4 (30.8)             | 9 (69.2)             | 11.45 (3.24-40.53)            | <b>0.0001</b>        |
| +             | -           | 34 (47.2)            | 38 (52.8)            | Reference                     |                      |
| +             | +           | 4 (30.8)             | 9 (69.2)             | 2.01 (0.57-7.14) <sup>a</sup> | 0.37                 |

<sup>a</sup>Odds ratio of SIL in women with both hrHPV and HHV (top of table) or EBV (bottom of table) compared to women with hrHPV but no HHV or EBV, respectively.

<sup>b</sup>Fisher's Exact Test p-value is presented.

Abbreviations: IARC, International Agency for Research on Cancer. hrHPV, high-risk human papillomavirus (HPV-16, 18, 31, 33, 35, 39, 45, 51, 52, 55, 56, 58, 68). HHV, human herpesvirus. SIL, squamous intraepithelial lesion. CI, confidence interval. EBV, Epstein-Barr virus.

**Online resource 5.** Association of cervical high-risk HPV (IARC-12 +HPV-68) and EBV detection with cervical squamous intraepithelial lesions (SIL) in HIV-infected women.

| Cervical hrHPV <sup>a</sup> | Cervical EBV | SIL-Negative No. (%) | SIL-Positive No. (%) | Odds Ratio (95% CI)            | p-value <sup>b</sup> |
|-----------------------------|--------------|----------------------|----------------------|--------------------------------|----------------------|
| -                           |              | 164 (82.0)           | 36 (18.0)            | Reference                      |                      |
| +                           |              | 51 (53.7)            | 44 (46.3)            | 3.93 (2.29-6.75)               | <b>&lt;0.001</b>     |
|                             | -            | 129 (79.6)           | 33 (20.4)            | Reference                      |                      |
|                             | +            | 86 (64.7)            | 47 (35.3)            | 2.14 (1.27-3.60)               | <b>0.004</b>         |
| -                           | -            | 96 (82.8)            | 20 (17.2)            | Reference                      |                      |
| +                           | -            | 33 (71.7)            | 13 (28.3)            | 1.89 (0.85-4.22)               | 0.116                |
| -                           | +            | 68 (81.0)            | 16 (19.0)            | 1.13 (0.55-2.34)               | 0.743                |
| +                           | +            | 18 (36.7)            | 31 (63.3)            | 8.27 (3.89-17.58)              | <b>&lt;0.001</b>     |
| +                           | -            | 33 (71.7)            | 13 (28.3)            | Reference                      |                      |
| +                           | +            | 18 (36.7)            | 31 (63.3)            | 4.37 (1.84-10.39) <sup>c</sup> | <b>&lt;0.001</b>     |

<sup>a</sup>Epstein-Barr virus and high-risk HPV were detected in cervical swabs collected from HIV-positive women enrolled in cohort 2.

<sup>b</sup>Fisher's Exact test p-value is presented.

<sup>c</sup>Odds ratio of SIL in women with both hrHPV and EBV compared to women with hrHPV but no EBV.

Abbreviations: IARC, International Agency for Research on Cancer. HIV, human immunodeficiency virus. hrHPV, high-risk human papillomavirus (HPV-16, 18, 31, 33, 35, 39, 45, 51, 52, 55, 56, 58, 68). EBV, Epstein-Barr virus. SIL, squamous intraepithelial lesion. CI, confidence interval.

**Online resource 6.** Predicted probability of an abnormal cervical cytology A) as a function of CD4 count at the mean age of 35.0 years old and B) as a function of age at the mean CD4 count of 390.7 for African Americans in the study using the model described in online resource 3, panel B (using the IARC-12 + HPV-68 classification of hrHPV).

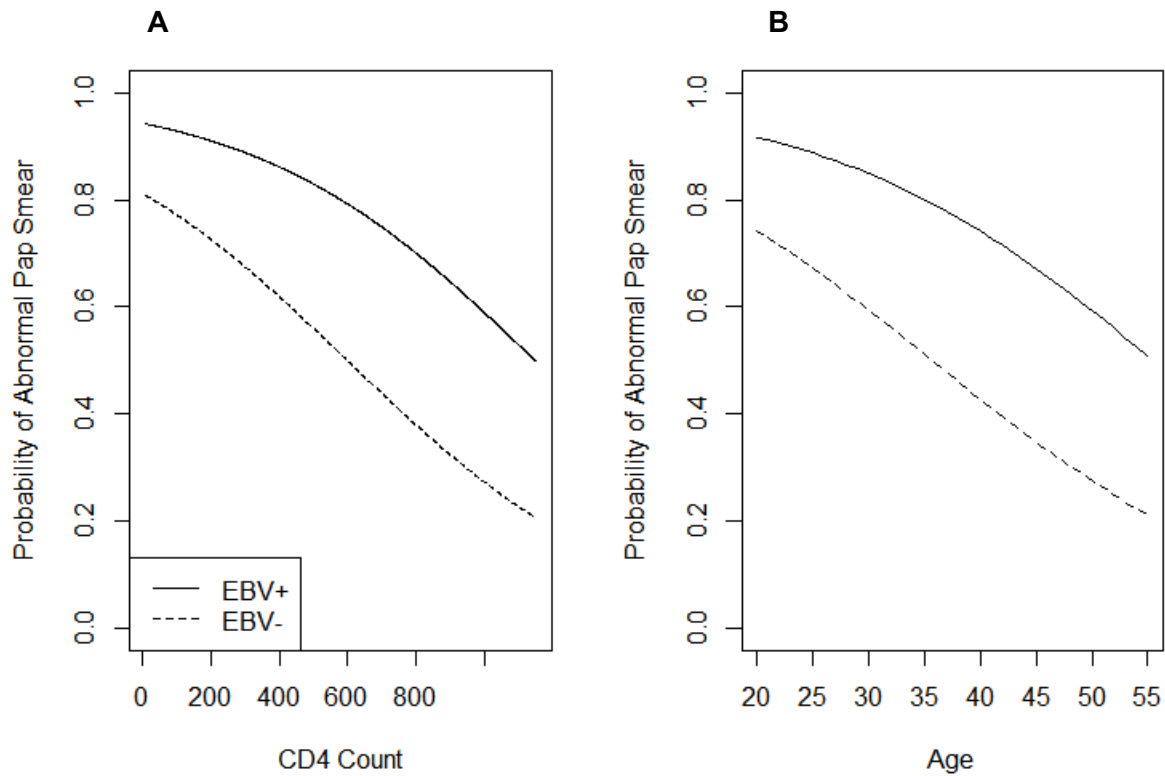



**Online resource 7.** Estimated Odds ratios from multivariable logistic regression model (online resource 3, panel B) for abnormal cervical cytology and 95% confidence intervals. Confidence intervals that do not overlap with the horizontal line indicate a significantly different odds ratio from 1.0. This analysis uses the IARC-12 + HPV-68 classification of hrHPV.

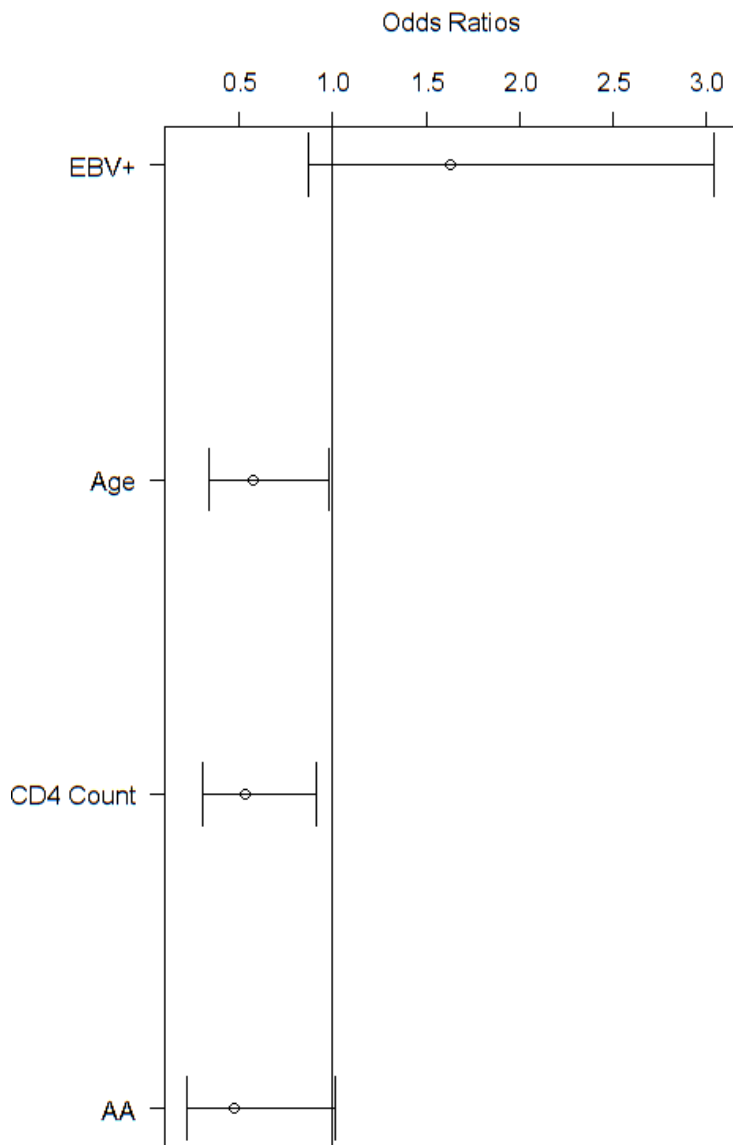

Supplement: NIHMS1569772-supplement-10552_2020_1287_MOESM1_ESM.pdf [file NIHMS1569772-supplement-10552_2020_1287_MOESM1_ESM.pdf]
